# Supplementary material
Source: PubMed Central journal article supplement (PMC8159813)
Supplement: 63_2021_776_MOESM1_ESM.pdf [file 63_2021_776_MOESM1_ESM.pdf]

Electronic Supplementary Material

Tabelle S1: Verteilung der Covid-19-Fälle auf Krankenhäuser nach verschiedenen Kriterien

| Fälle                                                                               | Unterteilung                                   | N      | Anteil | N (KH) | Anteil | Verlegungsart |           |          |              |        | Fallcharakteristika |          |                                         |                                       |
|-------------------------------------------------------------------------------------|------------------------------------------------|--------|--------|--------|--------|---------------|-----------|----------|--------------|--------|---------------------|----------|-----------------------------------------|---------------------------------------|
|                                                                                     |                                                |        |        |        |        | Keine         | Weg-verl. | Zu-verl. | Zu-Weg-verl. | Divers | Alter               | Männlich | Beatmungs-dauer in Tagen (Durchschnitt) | Verweil-dauer in Tagen (Durchschnitt) |
| <b>Gesamt</b>                                                                       |                                                |        |        |        |        |               |           |          |              |        |                     |          |                                         |                                       |
| Alle Fälle                                                                          | Gesamt                                         | 17.094 | 100%   | 1.082  | 100%   | 79%           | 8%        | 8%       | 1%           | 3%     | 67,4                | 52%      | 2,0                                     | 12,9                                  |
| Mit Beatmung                                                                        | Gesamt                                         | 2.813  | 100%   | 674    | 100%   | 56%           | 18%       | 17%      | 4%           | 6%     | 67,4                | 67%      | 12,3                                    | 23,1                                  |
| Ohne Beatmung                                                                       | Gesamt                                         | 14.281 | 100%   | 1.059  | 100%   | 84%           | 6%        | 7%       | 0%           | 3%     | 67,4                | 49%      | 0,0                                     | 10,9                                  |
| <b>Nach Quartilen auf Basis der AOK-Covid-19-Fallzahl</b>                           |                                                |        |        |        |        |               |           |          |              |        |                     |          |                                         |                                       |
| Alle Fälle                                                                          | 1. Quartil                                     | 521    | 3%     | 280    | 26%    | 51%           | 18%       | 20%      | 2%           | 9%     | 67,9                | 54%      | 1,8                                     | 12,4                                  |
| Alle Fälle                                                                          | 2. Quartil                                     | 1.571  | 9%     | 273    | 25%    | 70%           | 12%       | 12%      | 1%           | 4%     | 66,6                | 52%      | 1,9                                     | 13,3                                  |
| Alle Fälle                                                                          | 3. Quartil                                     | 3.487  | 20%    | 267    | 25%    | 78%           | 8%        | 9%       | 1%           | 4%     | 66,9                | 51%      | 2,1                                     | 13,6                                  |
| Alle Fälle                                                                          | 4. Quartil                                     | 11.515 | 67%    | 262    | 24%    | 82%           | 7%        | 7%       | 1%           | 3%     | 67,6                | 53%      | 2,0                                     | 12,7                                  |
| <b>Nach Quartilen auf Basis der AOK-Covid-19-Fälle mit Beatmung</b>                 |                                                |        |        |        |        |               |           |          |              |        |                     |          |                                         |                                       |
| Mit Beatmung                                                                        | 1. Quartil                                     | 216    | 8%     | 216    | 32%    | 57%           | 21%       | 10%      | 4%           | 8%     | 67,0                | 67%      | 11,1                                    | 20,5                                  |
| Mit Beatmung                                                                        | 2. Quartil                                     | 246    | 9%     | 123    | 18%    | 55%           | 21%       | 15%      | 3%           | 6%     | 68,6                | 68%      | 11,2                                    | 22,3                                  |
| Mit Beatmung                                                                        | 3. Quartil                                     | 710    | 25%    | 186    | 28%    | 58%           | 20%       | 14%      | 3%           | 5%     | 68,0                | 67%      | 12,8                                    | 24,1                                  |
| Mit Beatmung                                                                        | 4. Quartil                                     | 1.641  | 58%    | 149    | 22%    | 54%           | 16%       | 19%      | 4%           | 7%     | 67,1                | 67%      | 12,5                                    | 23,1                                  |
| <b>Nach Betten</b>                                                                  |                                                |        |        |        |        |               |           |          |              |        |                     |          |                                         |                                       |
| Alle Fälle                                                                          | 1 bis 200 Betten                               | 2.842  | 17%    | 353    | 33%    | 68%           | 9%        | 16%      | 1%           | 6%     | 70,2                | 50%      | 1,4                                     | 12,9                                  |
| Alle Fälle                                                                          | 201 bis 500 Betten                             | 6.703  | 39%    | 458    | 42%    | 82%           | 10%       | 5%       | 1%           | 3%     | 68,4                | 52%      | 1,7                                     | 12,1                                  |
| Alle Fälle                                                                          | Mehr als 500 Betten                            | 7.549  | 44%    | 271    | 25%    | 81%           | 7%        | 8%       | 1%           | 3%     | 65,5                | 54%      | 2,6                                     | 13,6                                  |
| Mit Beatmung                                                                        | 1 bis 200 Betten                               | 389    | 14%    | 147    | 22%    | 41%           | 19%       | 24%      | 4%           | 11%    | 69,5                | 67%      | 10,3                                    | 22,3                                  |
| Mit Beatmung                                                                        | 201 bis 500 Betten                             | 992    | 35%    | 298    | 44%    | 60%           | 23%       | 9%       | 3%           | 5%     | 69,0                | 65%      | 11,5                                    | 21,8                                  |
| Mit Beatmung                                                                        | Mehr als 500 Betten                            | 1.432  | 51%    | 229    | 34%    | 57%           | 13%       | 20%      | 4%           | 6%     | 65,8                | 68%      | 13,5                                    | 24,2                                  |
| Ohne Beatmung                                                                       | 1 bis 200 Betten                               | 2.453  | 17%    | 338    | 32%    | 72%           | 7%        | 15%      | 1%           | 5%     | 70,4                | 48%      | 0,0                                     | 11,4                                  |
| Ohne Beatmung                                                                       | 201 bis 500 Betten                             | 5.711  | 40%    | 452    | 43%    | 86%           | 8%        | 4%       | 0%           | 3%     | 68,3                | 49%      | 0,0                                     | 10,4                                  |
| Ohne Beatmung                                                                       | Mehr als 500 Betten                            | 6.117  | 43%    | 269    | 25%    | 87%           | 5%        | 6%       | 0%           | 2%     | 65,4                | 50%      | 0,0                                     | 11,1                                  |
| <b>Beatmungsstunden bei AOK-Fällen mit Pneumonie, Sepsis oder ARDS im Jahr 2019</b> |                                                |        |        |        |        |               |           |          |              |        |                     |          |                                         |                                       |
| Alle Fälle                                                                          | 1. Quartil (0 bis 2.797 Stunden)               | 1.669  | 10%    | 271    | 25%    | 64%           | 10%       | 18%      | 1%           | 7%     | 70,1                | 49%      | 0,9                                     | 12,2                                  |
| Alle Fälle                                                                          | 2. Quartil (mehr als 2.797 bis 6.622 Stunden)  | 3.433  | 20%    | 270    | 25%    | 82%           | 11%       | 5%       | 0%           | 2%     | 68,7                | 51%      | 1,3                                     | 11,7                                  |
| Alle Fälle                                                                          | 3. Quartil (mehr als 6.622 bis 14.052 Stunden) | 4.838  | 28%    | 270    | 25%    | 84%           | 8%        | 5%       | 1%           | 3%     | 68,3                | 51%      | 1,8                                     | 12,4                                  |
| Alle Fälle                                                                          | 4. Quartil (mehr als 14.052 Stunden)           | 7.154  | 42%    | 271    | 25%    | 78%           | 7%        | 10%      | 1%           | 3%     | 65,6                | 54%      | 2,8                                     | 13,9                                  |
| Mit Beatmung                                                                        | 1. Quartil (0 bis 2.797 Stunden)               | 169    | 6%     | 80     | 12%    | 51%           | 32%       | 7%       | 2%           | 7%     | 70,0                | 70%      | 9,2                                     | 18,0                                  |
| Mit Beatmung                                                                        | 2. Quartil (mehr als 2.797 bis 6.622 Stunden)  | 474    | 17%    | 164    | 24%    | 58%           | 30%       | 6%       | 2%           | 5%     | 69,5                | 65%      | 9,8                                     | 18,5                                  |
| Mit Beatmung                                                                        | 3. Quartil (mehr als 6.622 bis 14.052 Stunden) | 709    | 25%    | 192    | 28%    | 63%           | 17%       | 11%      | 3%           | 6%     | 68,0                | 63%      | 12,2                                    | 23,8                                  |
| Mit Beatmung                                                                        | 4. Quartil (mehr als 14.052 Stunden)           | 1.461  | 52%    | 238    | 35%    | 52%           | 13%       | 24%      | 4%           | 7%     | 66,2                | 68%      | 13,6                                    | 24,8                                  |
| Ohne Beatmung                                                                       | 1. Quartil (0 bis 2.797 Stunden)               | 1.500  | 11%    | 264    | 25%    | 66%           | 7%        | 19%      | 1%           | 7%     | 70,1                | 47%      | 0,0                                     | 11,6                                  |
| Ohne Beatmung                                                                       | 2. Quartil (mehr als 2.797 bis 6.622 Stunden)  | 2.959  | 21%    | 266    | 25%    | 85%           | 8%        | 4%       | 0%           | 2%     | 68,5                | 49%      | 0,0                                     | 10,6                                  |
| Ohne Beatmung                                                                       | 3. Quartil (mehr als 6.622 bis 14.052 Stunden) | 4.129  | 29%    | 263    | 25%    | 87%           | 6%        | 4%       | 0%           | 2%     | 68,3                | 49%      | 0,0                                     | 10,5                                  |
| Ohne Beatmung                                                                       | 4. Quartil (mehr als 14.052 Stunden)           | 5.693  | 40%    | 266    | 25%    | 85%           | 6%        | 6%       | 0%           | 2%     | 65,4                | 51%      | 0,0                                     | 11,2                                  |

**Abbildung S1: Verteilung der Covid-19-Fälle (mit und ohne Beatmung) und Krankenhäuser nach der Beatmungserfahrung der Krankenhäuser im Jahr 2019 nach Aufnahmemonat, Anteil in %**

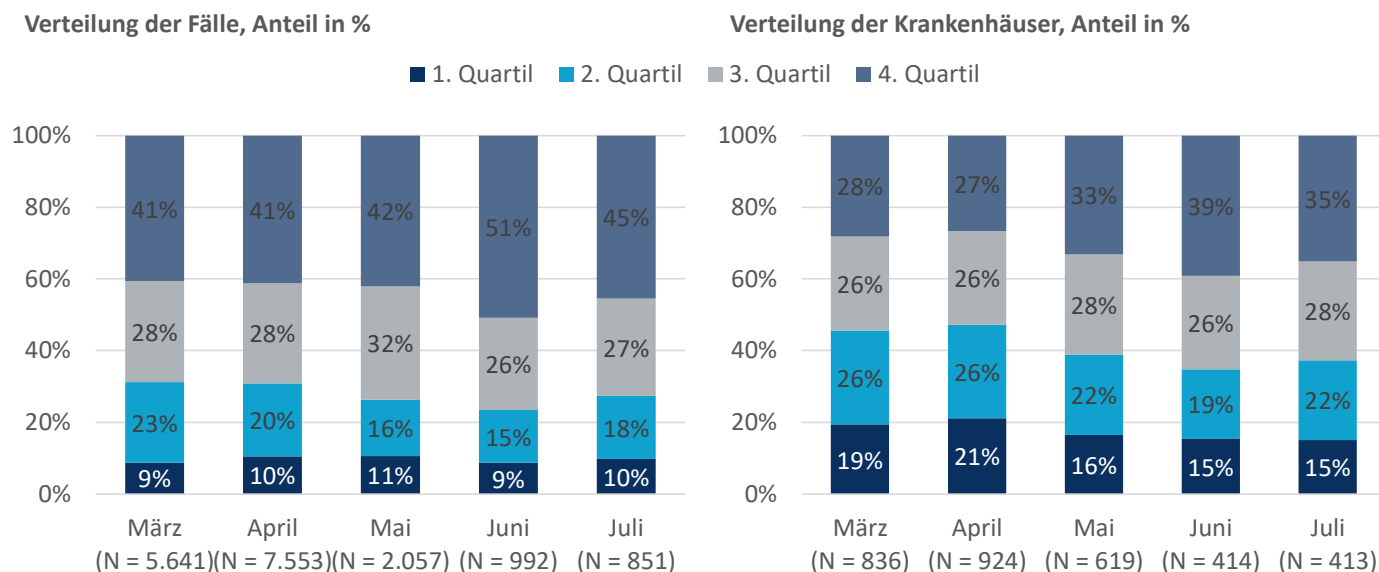

Anmerkung: Beatmungserfahrung definiert als Summe der Beatmungsstunden bei AOK-Fällen mit Pneumonie, Sepsis oder ARDS im Jahr 2019. Beatmungsstunden der AOK-Fälle: 1. Quartil – 0 bis 2.797 Stunden, 2. Quartil – mehr als 2.797 bis 6.622 Stunden, 3. Quartil – mehr als 6.622 bis 14.052 Stunden, 4. Quartil – mehr als 14.052 Stunden.

**Abbildung S2: Krankenhäuser mit und ohne Beteiligung an der Covid-19-Versorgung, Anteil in %**

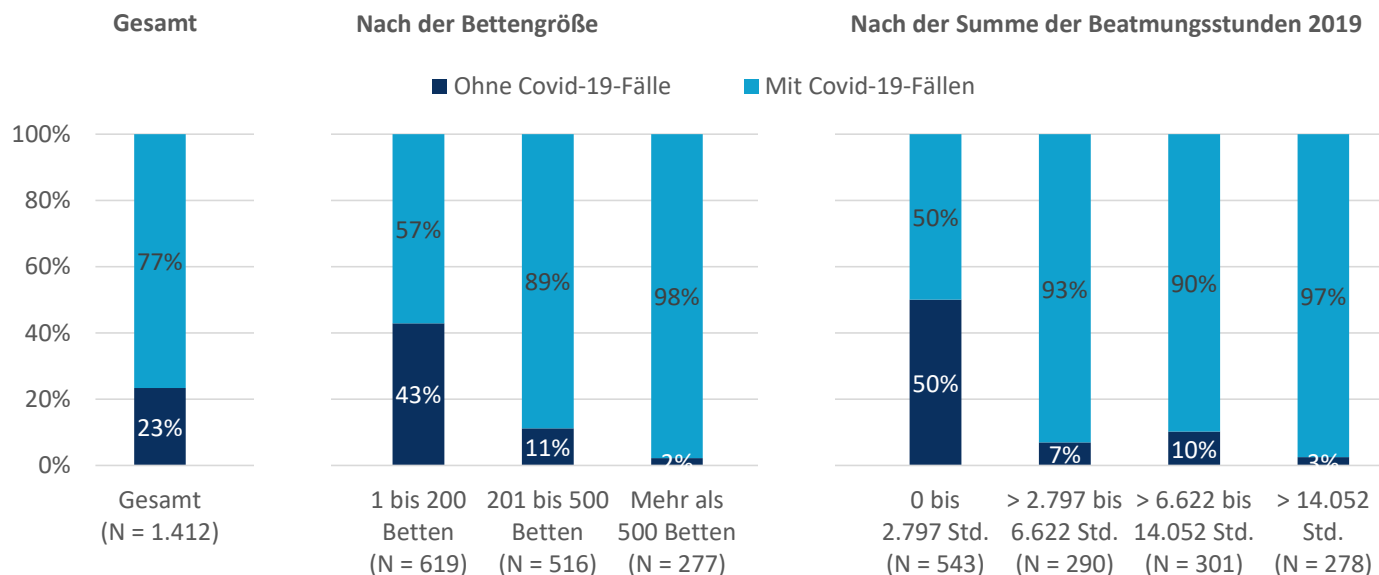

Anmerkung: Summe der Beatmungsstunden definiert aus den Beatmungsstunden bei AOK-Fällen mit Pneumonie, Sepsis oder ARDS im Jahr 2019. Beatmungsstunden ergeben sich aus der Quartilsverteilung der Krankenhäuser mit Covid-19-Behandlung.

**Abbildung S3: Art der Verlegung, Anteil in %**

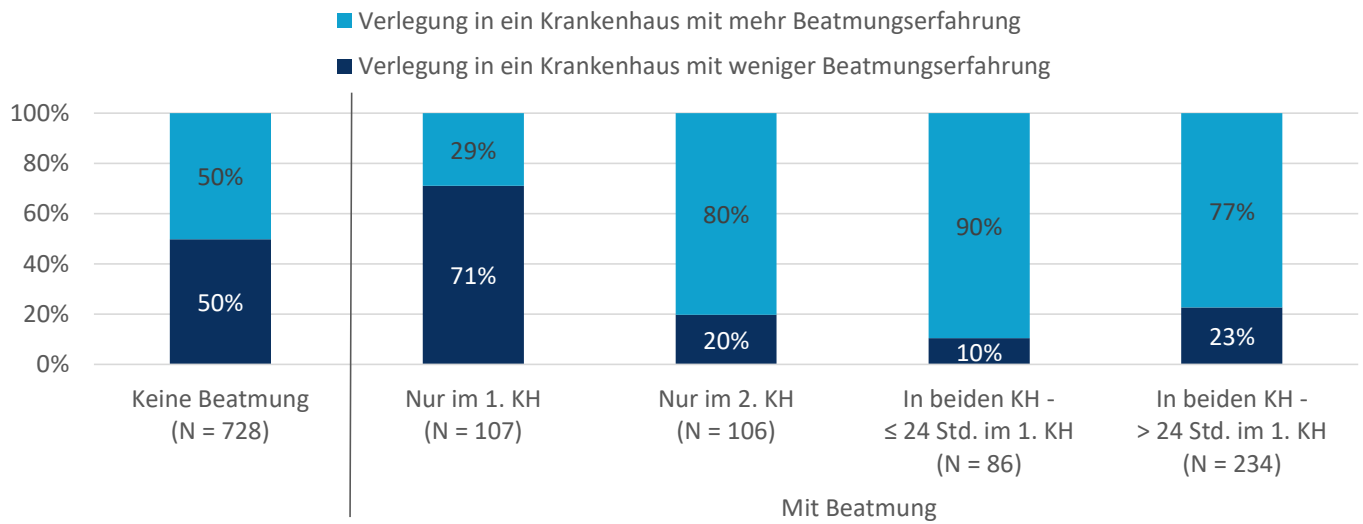

Anmerkung: Dargestellt werden Patienten mit einmaliger Verlegung. Ein Krankenhaus mit mehr Beatmungserfahrung ist definiert als ein Krankenhaus, welches mehr Beatmungstunden bei Fällen mit Pneumonie, Sepsis und ARDS im Jahr 2019 aufweist, als das Krankenhaus, in welchem der Patienten zuerst behandelt wurde. KH – Krankenhaus.
